# Supplementary material for: MRI-based radiomics features uncover the micro-change of dorsal root ganglia lesion for patients with post-herpetic neuralgia
Source: Front Neurol. 2023 Nov 22;14:1257648. doi: 10.3389/fneur.2023.1257648 (PMC10710153; doi:10.3389/fneur.2023.1257648)
Supplement: Supplementary file 1 [file Table_1.XLSX]

## Sheet: 原始
group	Maximum2DDiameterColumn	SurfaceVolumeRatio	10Percentile	90Percentile	Energy	Entropy	InterquartileRange	Maximum	MeanAbsoluteDeviation	Mean	Median	Minimum	TotalEnergy	Variance	Autocorrelation	ClusterProminence	Contrast	DifferenceAverage	Id	JointAverage	JointEnergy	MaximumProbability	SumAverage	GrayLevelNonUniformityNormalized	GrayLevelVariance	HighGrayLevelRunEmphasis	LongRunHighGrayLevelEmphasis	LongRunLowGrayLevelEmphasis	LowGrayLevelRunEmphasis	RunEntropy	RunLengthNonUniformity	ShortRunHighGrayLevelEmphasis	ShortRunLowGrayLevelEmphasis	GrayLevelNonUniformityNormalized	GrayLevelVariance	HighGrayLevelZoneEmphasis	LargeAreaHighGrayLevelEmphasis	LowGrayLevelZoneEmphasis	SizeZoneNonUniformity	SmallAreaEmphasis	ZonePercentage	Coarseness	Complexity	Contrast	Strength
1	2.41406	4.12266	36.7	78.1	33277	1.37095	31.5	79	16.84	54.7	47.5	25	17238.1	335.61	3.11905	3.85417	1.60119	0.975	0.616865	1.78393	0.171978	0.254762	3.56786	0.422454	0.651042	3.36806	5.74306	1.44232	0.647184	1.84283	5.75694	2.85532	0.529417	0.333333	0.666667	4.66667	29.3333	0.453704	1.66667	0.175926	0.3	0.28463	2.77	0.169244	1.10924
1	3.21875	4.06286	51	91	53397	1.32218	29.5	93	14.7934	67.7273	67	48	27660.6	267.289	5.83899	0.905923	0.79256	0.63006	0.712054	2.42366	0.218797	0.267262	4.84732	0.430335	0.401612	5.16667	13.1905	0.535053	0.302249	1.97755	4.5873	3.31944	0.253968	0.333333	0.666667	4.66667	96.3333	0.453704	1	0.363426	0.272727	0.414275	1.69749	0.0758959	1.02113
1	3.21875	3.50598	50.4	93.4	71244	1.37528	21.5	104	13.7333	66.8	61	48	41057.5	287.36	5.98737	2.68966	1.1976	0.818182	0.654146	2.45455	0.191877	0.33649	4.90909	0.439554	0.571824	5.82718	12.8845	0.614965	0.273563	2.2607	7.34405	4.78005	0.233038	0.25	1.25	7.5	124.5	0.355903	1.5	0.530278	0.266667	0.274989	3.55793	0.0485578	1.49484
1	4.02344	3.55789	73.1	116.9	171032	1.48068	27.75	121	14.1111	96	94.5	65	98564.8	285.778	5.16812	3.34052	0.670717	0.540589	0.751394	2.24302	0.176399	0.263374	4.48604	0.36274	0.546471	5.23805	15.896	0.812047	0.354887	2.50965	5.9053	3.52263	0.278065	0.375	0.6875	5.75	149.5	0.368056	1	0.288628	0.222222	0.389189	1.18141	0.071998	0.954743
1	3.21875	3.93838	81.4	131.8	162077	1.82625	26	138	17.1598	109.923	117	73	83958.7	384.379	8.70238	5.1055	1.4246	0.972222	0.589286	2.9504	0.140401	0.204365	5.90079	0.296677	0.836765	8.14053	14.2939	0.299135	0.228822	2.29018	8.0553	6.85218	0.21433	0.333333	0.888889	6.33333	65.6667	0.320602	2	0.566852	0.461538	0.372137	4.19394	0.106906	1.60917
1	3.16667	6.79591	919.8	1257.4	31085543	3.78347	228	1277	113.424	1107.8	1118	877	3.37695e+06	16200.9	128.951	6529.79	37.5874	4.75556	0.299916	11.1723	0.0353829	0.0566467	22.3446	0.0771706	26.0576	118.855	143.745	0.0803062	0.0795458	3.8598	22.1286	112.633	0.0793557	0.0748299	26.1406	108	243.952	0.08999	15.6667	0.886243	0.84	0.139352	380.233	0.966446	16.4087
1	2.63889	7.71323	871	1392	16566267	3.39275	230	1455	163.953	1110.54	1146	732	1.79966e+06	41032.6	347.224	27710	146.049	10.2205	0.177135	18.9129	0.0772321	0.0876488	37.8259	0.0997493	67.3865	318.255	343.255	0.0852401	0.0850839	3.39913	12.2917	312.005	0.0850448	0.0972222	70.4097	313.25	413.25	0.09014	10.1667	0.9375	0.923077	0.110115	924.702	9.59861	30.4726
1	2.35885	7.14358	634.8	777	3378855	2.23593	81	801	51.0204	692.143	668	630	919138	3631.84	11.5625	176.958	18.6667	3.79167	0.26875	3.75	0.182292	0.197917	7.5	0.22449	6.20408	17	17	0.379216	0.379216	2.23593	7	17	0.379216	0.22449	6.20408	17	17	0.379216	7	1	1	0.20649	49.2659	1.90406	6.29059
1	5.50398	5.97976	536.6	875.6	13480398	3.57366	178	910	105.872	722.8	717	438	3.66702e+06	16776.1	186.145	5625.72	58.5576	6.21161	0.226168	13.7864	0.0406691	0.0794986	27.5728	0.0948942	26.4817	182.651	216.23	0.0544815	0.0539192	3.65016	23.3182	178.347	0.0538176	0.0867769	26.9669	175.364	309.682	0.0587759	18.2727	0.925505	0.88	0.103529	478.58	1.33001	15.2421
1	1.58333	8.41363	728.2	816.6	4149997	2.23593	39.5	864	32.5306	768.714	763	721	450832	1935.06	10.9375	54.9745	9.91667	2.5	0.389335	3.45833	0.169271	0.177083	6.91667	0.223923	3.33787	13.5238	14.0238	0.289454	0.258204	2.23985	6.33333	13.3988	0.250391	0.222222	3.55556	14.6667	16.6667	0.259188	4.33333	0.875	0.857143	0.418327	21.9167	0.572983	6.16399
1	3.69444	6.47353	582.8	849.1	17868012	3.57494	139	898	84.3841	718.235	741	534	1.94108e+06	9667.83	72.7386	3584.31	22.4402	3.86785	0.307763	8.24116	0.0262665	0.0391414	16.4823	0.0986842	15.3287	82.854	95.8868	0.0774308	0.0686919	3.66389	29.0202	79.5958	0.0665072	0.0973937	15.5995	83.8148	151.889	0.0717156	17.2963	0.828189	0.794118	0.128621	211.159	0.452168	10.8033
1	4.22222	6.47353	585.9	1046.8	23332626	4.0941	246.5	1212	140.931	810.412	777.5	537	2.53472e+06	29486.5	180.814	28812.6	70.0336	6.52098	0.254394	13.0851	0.0244712	0.048576	26.1702	0.0638545	47.3613	193.309	225.776	0.101887	0.0759565	4.1643	28.756	185.918	0.0695845	0.0621302	49.7352	200.269	387.5	0.0629596	16.1538	0.816239	0.764706	0.106069	943.533	1.45186	23.2283
1	2.41406	6.58113	139.9	165.4	93907	1	14.25	169	10.25	152.75	153	136	48645.5	144.187	2.66667	0	0.666667	0.666667	0.666667	1.66667	0.666667	0.666667	3.33333	0.518519	0.240741	2.33333	3.66667	0.75	0.666667	0.972765	3.22222	2	0.645833	0.555556	0.222222	2	6	0.75	1.66667	0.75	0.75	0.631579	0.791667	0.197917	0.631579
1	4.75	6.59472	449.9	678.2	11295060	3.3997	110.25	733	75.699	568.059	582.5	329	1.22703e+06	9516.82	104.06	3721.55	27.7932	4.17572	0.308538	10.1017	0.0280594	0.0507765	20.2033	0.103255	15.2867	118.17	146.043	0.122415	0.0959228	3.58825	27.6568	111.201	0.0892997	0.0976331	15.0251	117.346	254	0.0871238	16.1538	0.816239	0.764706	0.115337	207.171	0.64891	8.57613
1	4.22222	6.29381	496.5	724.5	18589835	3.61199	155.25	780	78.1267	629.196	656	401	2.01949e+06	8239.68	113.328	2169.56	17.7177	3.30312	0.359228	10.5346	0.0227881	0.0553074	21.0692	0.0914939	13.7982	102.897	147.428	0.046911	0.0437626	3.91588	34.4981	92.0141	0.0431683	0.08	14.2456	87.6333	415.8	0.0572506	16.8667	0.771991	0.652174	0.108599	212.51	0.334178	8.43986
1	2.15	8.05901	560.6	723.4	2023535	2.32193	101	753	67.36	631.8	600	549	457296	5535.76	28.1667	170.769	32.0833	5.08333	0.209226	5.83333	0.291667	0.291667	11.6667	0.2	10	35	35	0.240804	0.240804	2.32193	5	35	0.240804	0.2	10	35	35	0.240804	5	1	1	0.218182	87.3833	4.58333	8.72727
1	2.86667	6.61324	651	924	7301998	2.91398	188.5	1030	105.256	805.818	778	633	1.65017e+06	14475.1	81.4637	3198.64	57.4512	6.24643	0.249162	9.30655	0.0886471	0.115774	18.6131	0.140248	22.9347	87.4341	92.3091	0.142691	0.136473	2.91795	9.6	86.2153	0.134918	0.135802	25.1358	96.4444	118.111	0.152058	5.88889	0.833333	0.818182	0.138739	250.526	3.92829	14.36
1	1.60938	5.09287	105.8	118.4	50766	-3.20343e-16	9	119	5.5	112.5	113.5	104	29256.2	35.25	1	0	0	0	1	1	1	1	2	1	0	1	3	3	1	0.459148	1.83333	0.5	0.5	1	0	1	16	1	1	0.0625	0.25	1000000	0	0	0
1	3.21875	3.60557	79.9	117.7	141052	1.26381	18	126	12.3265	99.2857	96	75	81287.5	217.49	2.43294	1.86429	0.844444	0.661905	0.699471	1.55278	0.196699	0.313095	3.10556	0.424504	0.437438	2.95455	5.23409	1.80006	0.619949	2.19002	6.23636	2.53578	0.476042	0.375	0.5	4.5	35.25	0.402778	1.5	0.519531	0.285714	0.331548	1.74018	0.0683714	1.07492
1	1.60938	4.60269	76.2	106	45086	1.52193	4	110	12.24	93.6	99	63	29194.2	256.24	5.33333	0.546296	1.08333	0.916667	0.569444	2.33333	0.381944	0.395833	4.66667	0.353333	0.586667	5.21667	8.46667	0.462037	0.371759	1.53769	4.16667	4.40417	0.34919	0.333333	0.666667	4.66667	17.6667	0.453704	1.66667	0.5	0.6	0.75	2.25	0.152444	1.86122
1	3.21875	3.5122	120	184	247340	1.98083	45	187	24.6942	147.636	136	112	160158	688.959	6.74464	7.43279	2.16637	1.20268	0.541047	2.60729	0.132514	0.174256	5.21458	0.264362	1.17497	6.46307	10.1568	0.482102	0.415305	2.18209	7.9125	5.53963	0.398606	0.333333	1.33333	5.33333	30.6667	0.570602	2.33333	0.578704	0.545455	0.365059	5.53474	0.189856	1.75415
1	3.95591	5.79064	78.4	1273.8	11528587	3.96982	463	2119	417.329	611.118	521	0	2.47233e+06	304687	487.727	2.95184e+06	746.134	20.5073	0.12535	21.7851	0.0479311	0.0591811	43.5702	0.064933	487.114	1123.24	1128.91	0.0806701	0.0802827	3.97736	16.2812	1121.82	0.0801858	0.0625	499.984	1169.5	1192.19	0.0836066	14.125	0.953125	0.941176	0.0585841	7968.2	66.1175	112.668
1	4.02344	3.69772	68.5	142	222661	2.15522	49.25	152	25.7222	107.5	111	61	115342	813.806	10.4318	16.6618	2.43881	1.24301	0.549126	3.22115	0.101362	0.19493	6.44231	0.226821	1.49556	8.91544	19.9838	0.376511	0.310081	2.59019	10.9961	7.08585	0.297136	0.24	1.64	7.4	71.8	0.407472	5.2	0.738889	0.555556	0.270696	8.65588	0.138275	1.98187
1	4.75	6.61894	409.6	901.3	13815325	4.12323	321.75	989	162.033	650.367	655	286	1.50082e+06	37534	325.213	47254.7	74.9486	7.23905	0.197252	17.5214	0.0245075	0.0397619	35.0429	0.0621723	58.7287	295.293	334.475	0.0455346	0.0453074	4.14292	27.8387	285.498	0.0452506	0.0617284	57.358	279.037	443.259	0.048808	21.6667	0.916667	0.9	0.110178	990.918	1.7923	30.5373
1	4.95935	6.06129	408.3	588.5	5133397	2.81104	92.75	612	64.5	476.136	471.5	301	1.13373e+06	6630.39	67.1592	905.418	18.8284	3.59512	0.321811	8.18611	0.0481377	0.0676435	16.3722	0.159039	10.6996	66.9364	85.5739	0.11917	0.115752	2.97533	17.8	62.277	0.114898	0.15625	11.7344	62.5	165.812	0.143816	8.625	0.756944	0.727273	0.125298	101.073	1.00338	6.31649
1	2.83392	6.71389	438	746	4480070	2.84535	240.5	895	128.529	620.727	663	396	989444	21976.7	141.67	9850.55	65.3286	6.85476	0.212922	11.8845	0.0901219	0.120238	23.769	0.157769	35.044	138.693	153.393	0.116859	0.116476	2.84562	10.3	135.018	0.116381	0.16	36.49	134.5	193.3	0.124626	8.2	0.925	0.909091	0.163251	288.252	6.17445	23.147
1	3.16667	6.5088	620.3	998.4	20625196	3.94839	212.75	1134	125.707	815.4	837	518	2.2406e+06	22629.4	212.012	16096.7	52.464	5.79508	0.251956	14.3412	0.0265253	0.0499894	28.6824	0.0688854	37.5338	206.954	232.303	0.0482838	0.0478405	4.04029	27.1059	200.617	0.0477297	0.0680473	40.966	203.038	373.346	0.0528466	22.2308	0.935096	0.866667	0.118653	635.383	1.21322	20.7191
1	2.63889	7.10495	659	950	10085435	3.32782	233.5	1045	121.227	782.312	725	558	1.09562e+06	18326.8	126.641	8381.93	53.4068	6.05227	0.242115	11.1443	0.0537603	0.0840909	22.2886	0.108455	28.9832	125.816	142.316	0.0851872	0.0819715	3.37029	13.85	121.691	0.0811675	0.100592	30.071	128.538	204.692	0.092393	8.38462	0.826923	0.8125	0.121513	377.446	2.42011	18.105
1	2.11111	7.28039	564.9	778.6	6422382	3.18201	128.5	820	75.5918	671.857	699	535	697691	7349.55	50.4698	706.472	22.5246	3.93254	0.286806	7.16786	0.064246	0.094246	14.3357	0.119615	11.8639	51.4256	62.0923	0.137429	0.134825	3.19941	13.0417	50.2404	0.134535	0.111111	12.9097	49.9167	92.5833	0.149129	10.1667	0.925926	0.857143	0.218247	140.634	0.782745	11.4422
1	2.63889	6.73612	569.8	946.5	14761724	3.88684	223.5	992	123.333	770	781.5	406	1.60363e+06	22171.8	283.913	14160.1	43.7639	5.24177	0.250974	16.6037	0.0324985	0.0497205	33.2074	0.0724513	35.1603	269.668	301.882	0.0492521	0.0488422	3.91515	21.8626	261.614	0.0487398	0.0702948	35.9909	263.857	402.429	0.0535803	15.8571	0.892857	0.875	0.16063	518.684	1.12299	25.5141
1	4.22222	6.64772	504.9	695.3	11099234	3.32409	133.25	808	73.1822	601.733	596	422	1.20576e+06	7891.46	83.6548	2019.96	24.1031	3.98674	0.30306	9.12242	0.0299683	0.0457684	18.2448	0.111137	12.7395	85.4093	102.655	0.0563768	0.054139	3.50029	25.7553	81.0978	0.0535796	0.104167	13.5208	81.5833	173.083	0.061627	15.75	0.837963	0.8	0.105198	207.541	0.580012	8.63381
1	2.41406	4.36414	118.5	144.5	139236	0.811278	14.75	148	9	131.5	130	115	72126.7	112.25	3.30833	0.0726263	0.345833	0.345833	0.827083	1.82708	0.493437	0.654167	3.65417	0.528889	0.235556	2.85	10.05	0.9875	0.5375	1.59994	2.58333	1.49444	0.452778	0.555556	0.222222	2	48.6667	0.75	1.66667	0.675926	0.375	0.739762	0.337946	0.0734933	0.637813
1	2.41406	4.28882	155.7	169.3	260374	0.468996	5.5	172	5.16	161.2	162	144	134878	51.96	3.74524	0.0604216	0.127381	0.127381	0.93631	1.93631	0.778308	0.872619	3.87262	0.687361	0.156319	3.4125	18.6458	1.34896	0.396875	1.51022	2.46667	1.41782	0.272208	0.5	0.25	2.5	162.5	0.625	1	0.506173	0.2	1.57835	0.126714	0.0143357	1.25561
1	3.16667	6.9128	471.8	638.4	6247411	3.17095	101	688	58.75	554.25	558.5	396	678683	5177.49	66.0787	1088.94	11.9296	2.78599	0.376244	8.0255	0.0486853	0.0813187	16.051	0.117741	8.5619	66.5629	88.2558	0.0812985	0.0771562	3.38619	15.1096	61.1396	0.0761206	0.112245	10.2041	63.2857	182.571	0.0962786	7.71429	0.765873	0.7	0.240902	84.1843	0.360725	10.0565
1	4.22222	6.53481	417.2	678.8	10550121	3.46502	135.75	741	87.5723	563.781	582.5	328	1.1461e+06	11842	110.486	7600.47	16.8398	3.16317	0.377788	10.0182	0.0305132	0.0566032	20.0364	0.0962108	17.6069	120.474	158.794	0.115625	0.0747385	3.69651	23.608	111.071	0.0652114	0.0975057	14.6304	118.476	326.857	0.061021	9.85714	0.698743	0.65625	0.177509	134.729	0.571815	14.8531
1	3.16667	6.60594	554.1	755.1	13336810	3.40291	135.75	846	69.6222	661.667	672	512	1.44883e+06	6757.56	60.2371	1325.13	15.842	3.05433	0.391285	7.66313	0.032634	0.0666617	15.3263	0.100875	10.9457	58.5107	87.5452	0.0982597	0.0829666	3.71445	20.5	51.2521	0.0791433	0.0925926	12.3488	56.0556	255.944	0.101266	7.88889	0.681235	0.6	0.151007	136.162	0.395239	8.1664
1	1.60938	6.41547	145	171.4	74834	1.58496	16.5	176	12.4444	157.333	153	143	38765.3	190.889	3.66667	0	2	1.33333	0.444444	2	0.5	0.5	4	0.333333	0.666667	4.66667	4.66667	0.453704	0.453704	1.58496	3	4.66667	0.453704	0.333333	0.666667	4.66667	4.66667	0.453704	3	1	1	1	3	0.222222	2.66667
1	3.57589	5.43248	69.6	105.2	122180	1.43156	11.75	112	11.449	92.2857	97	59	26038.6	210.49	4.94643	2.18277	0.778571	0.653571	0.694048	2.21786	0.190603	0.271429	4.43571	0.381263	0.495782	5.4072	11.5634	0.646596	0.320128	2.18432	6.52462	4.10803	0.253505	0.36	0.56	5.4	53.8	0.344444	1.4	0.327778	0.357143	0.383737	1.55519	0.0823473	0.919037
1	1.78795	5.87391	132.2	165	207323	0.918296	13	165	10.5926	151.222	155	125	44184	167.728	2.96667	0.263744	0.441667	0.441667	0.779167	1.72917	0.392083	0.508333	3.45833	0.512813	0.243594	2.66875	8.72708	1.10208	0.582812	1.63001	3.5125	1.56157	0.478458	0.555556	0.222222	2	49.6667	0.75	1	0.425926	0.333333	0.517241	0.42963	0.100412	0.491803
1	4.22222	6.9383	465.5	761.5	9660889	3.69026	214.5	777	102.538	598.5	579.5	413	1.0495e+06	13370.4	95.0347	4084.8	38.6466	5.13841	0.248207	9.67711	0.0317534	0.048312	19.3542	0.0883787	20.4554	89.2223	102.722	0.0744105	0.0741438	3.73686	24.54	85.8473	0.0740772	0.0902778	18.776	80.7917	155.792	0.0784716	22.0833	0.962963	0.923077	0.110158	370.656	0.781937	12.701
1	3.16667	6.63574	566.5	843.5	13828893	3.68642	130.5	917	89.3491	719.962	721.5	428	1.50229e+06	13535.9	175.621	7705.84	28.5594	4.01277	0.334038	13.083	0.0407722	0.0925697	26.1659	0.0813748	23.8305	173.878	219.736	0.0560729	0.0541392	3.93058	21.1894	165.82	0.05382	0.075	28.3275	175.95	427.15	0.0636661	16.3	0.907556	0.769231	0.181407	321.048	0.660951	20.3738
1	4.75	6.23819	509.9	937	30432488	4.26238	218.25	1075	132.958	778.25	798	354	3.30601e+06	28337.1	370.235	25803	63.6194	6.15402	0.253199	19.0903	0.0171556	0.0359977	38.1805	0.0585253	46.8098	353.323	438.505	0.0328543	0.0324571	4.43393	41.2488	334.877	0.0323724	0.0545694	50.881	335.538	728.128	0.0374487	28.3846	0.873932	0.8125	0.0856551	1145.85	0.879606	22.0117
1	3.69444	6.36151	454.7	911.8	19487956	4.34623	303.5	1001	150.371	693.947	714.5	348	2.11706e+06	31278	292.96	32891.6	59.754	5.78456	0.256335	16.6596	0.0189316	0.0295219	33.3191	0.0551313	52.0396	284.918	320.377	0.0382899	0.0375633	4.39953	33.6667	276.054	0.0373817	0.0527344	55.3818	285.094	444.656	0.0420084	22.25	0.859375	0.842105	0.133475	995.184	0.853914	32.9884
1	4.22222	6.42525	311.2	518	6859527	3.63519	122	616	68.3421	416.342	416	261	745179	7173.12	56.7047	2817.62	18.7627	3.45566	0.320056	7.28163	0.0243027	0.0385974	14.5633	0.0889254	11.4149	64.0657	68.7549	0.107729	0.0827558	3.72375	33.6381	62.8934	0.0765124	0.0878906	11.4375	67.6875	89.1562	0.0663849	22.25	0.859375	0.842105	0.136762	171.844	0.303623	8.76864
1	5.27778	5.95441	412	645.2	22087660	3.72766	152	743	76.3458	520.759	511	321	2.39948e+06	8400.18	89.4499	3029.29	9.63436	2.42745	0.420229	9.08355	0.0186874	0.052599	18.1671	0.0823437	13.5145	99.3361	152.135	0.0409384	0.0329404	4.22203	52.8235	88.6943	0.0311124	0.0746692	14.4939	102.283	568.913	0.0400461	19.8261	0.667841	0.582278	0.122425	153.974	0.143769	11.5056
1	3.16667	6.6573	539	674	11977111	2.82922	73	717	41.9272	619.452	632	509	1.30112e+06	2638.12	28.4879	185.892	8.41318	2.32333	0.412559	5.34011	0.042717	0.0935606	10.6802	0.152423	4.27009	30.8125	45	0.108119	0.0987926	3.18247	23.4286	28.1089	0.0969389	0.136364	4.93595	28.5909	103.045	0.118414	15	0.840278	0.709677	0.136623	53.7466	0.202877	3.41081
1	4.02344	3.33207	109.8	200.8	487533	2.09486	28	213	28.3945	164.765	174	56	315688	1531	29.6632	35.8047	4.26989	1.5684	0.505837	5.46514	0.0958403	0.149257	10.9303	0.249236	2.63371	28.5991	44.4887	0.124028	0.108387	2.53509	11.2493	24.6267	0.104477	0.209877	3.7284	26.5556	153.556	0.155399	3.44444	0.627901	0.529412	0.280247	13.9307	0.288492	3.70053
1	2.41406	4.25254	96.5	143	97283	1.25163	26.25	144	19.3333	125.5	137	86	62992.9	463.583	6.72917	1.95801	1.02083	0.645833	0.739583	2.59375	0.390625	0.541667	5.1875	0.4075	0.66375	6.075	15.525	0.459028	0.342361	1.71096	2.7	3.7125	0.313194	0.333333	0.666667	4.66667	49.6667	0.453704	1.66667	0.6875	0.5	0.882353	1.53778	0.103704	2.8125
1	2.83392	7.36724	513.5	663.1	2842915	2.5	97.25	675	56.2188	592.625	610	475	627871	4159.98	35.1458	338.007	11.8958	3.0625	0.290724	5.90625	0.142361	0.15625	11.8125	0.1875	6.73438	35.625	35.625	0.16577	0.16577	2.5	8	35.625	0.16577	0.1875	6.73438	35.625	35.625	0.16577	8	1	1	0.313316	48.4944	1.01764	9.73346
0	1.60938	5.40331	240.9	271.3	266106	0.811278	16	274	12	257.5	261	234	137848	220.25	3	0.03125	0.5	0.5	0.75	1.75	0.5625	0.625	3.5	0.572917	0.213542	3.0625	6.0625	0.671875	0.484375	1.39154	2.25	2.3125	0.4375	0.5	0.25	2.5	18.5	0.625	1	0.555556	0.5	1	0.5	0.09375	1
0	1.60938	5.40331	209.6	256.1	220525	1	39.75	257	21.75	233.75	236	206	114236	492.188	3.5	4	3	1.5	0.5	2	0.5	0.5	4	0.5	1	5	8.75	0.972222	0.555556	1	3.5	4.0625	0.451389	0.5	1	5	20	0.555556	2	0.25	0.5	0.375	2.66667	1.33333	1.5
0	1.60938	5.40331	107.3	189.7	95638	2	41	202	32	149.5	152	92	49542.2	1559.25	10.625	24.25	9.75	2.75	0.3125	3.5	0.375	0.375	7	0.25	3.25	15.5	15.5	0.300347	0.300347	2	4	15.5	0.300347	0.25	3.25	15.5	15.5	0.300347	4	1	1	0.5	18.6667	1.08333	6.5
0	2.41406	4.78621	83	143.6	97297	2.23593	34.5	155	23.7959	114.429	119	62	50401.6	805.673	10.7917	12.3484	3.66667	1.54167	0.483333	3.33333	0.188368	0.239583	6.66667	0.223356	1.64357	11.3393	14.4643	0.267847	0.246146	2.24378	5.66667	10.558	0.24072	0.2	2	11	26	0.292722	2.6	0.7	0.714286	0.933333	7.85714	0.151409	5.22648
0	3.21875	4.14352	189	287	1262427	2.14179	42	299	30.5578	242.429	247	175	653959	1343.96	11.0425	32.142	2.95405	1.36149	0.541057	3.28979	0.079267	0.112288	6.57957	0.238188	1.84499	11.5373	20.2829	0.375611	0.282448	2.70147	12.9105	9.64717	0.260315	0.22314	2.08264	10.5455	65.5455	0.344394	4.09091	0.612374	0.52381	0.190012	10.209	0.196484	1.63716
0	2.41406	4.71288	104.2	147.4	78268	1.37095	9	163	16.24	123.2	117	97	45105.4	475.36	5	0.046875	2.875	1.375	0.53125	2.3125	0.375	0.4375	4.625	0.4075	1.07375	6.025	7.525	0.470313	0.376563	1.68548	3.75	5.65	0.353125	0.333333	1.55556	7	17.6667	0.4375	1.66667	0.703704	0.6	0.631579	4.16667	0.336	2.89524
0	2.41406	4.22161	104.6	150.8	113719	1.55666	28	152	15.3061	126.143	126	101	65535.6	333.551	3.8125	4.51562	1.375	0.875	0.645833	1.9375	0.25	0.3125	3.875	0.347151	0.678678	4.30655	7.18155	1.01257	0.507358	1.84831	4.54167	3.5878	0.381056	0.333333	0.666667	4.66667	20.3333	0.453704	1.66667	0.203704	0.428571	0.509091	2.34524	0.187237	1.46218
0	1.60938	5.40331	163.7	173	114679	-3.20343e-16	5.25	173	4.125	169.25	171.5	161	59405.7	24.1875	1	0	0	0	1	1	1	1	2	1	0	1	3	3	1	0.459148	1.83333	0.5	0.5	1	0	1	16	1	1	0.0625	0.25	1000000	0	0	0
0	2.41406	4.50439	149.4	173.4	182636	1.14883	14	177	9.30612	161.143	160	141	94608.7	123.837	4.3125	0.369466	0.770833	0.645833	0.697917	2.09375	0.282986	0.416667	4.1875	0.47	0.366667	4.36667	8.16667	0.599537	0.362037	1.8572	3.66667	3.63889	0.316551	0.333333	0.666667	4.66667	36.6667	0.453704	1.66667	0.68	0.428571	1.02439	1.24603	0.045805	1.69731
0	2.41406	4.28975	67.4	92.9	47956	1	10.5	95	8.375	76.75	74.5	66	24842.1	103.938	2.4	0.415308	0.5375	0.5375	0.73125	1.55625	0.280938	0.31875	3.1125	0.507551	0.246224	2.37143	5.8	1.24643	0.657143	1.78433	3.5381	1.73651	0.52371	0.5	0.25	2.5	40	0.625	2	0.0625	0.25	0.489796	0.510417	0.127604	0.489796
0	3.21875	4.10435	53	73	48465	0.413817	9.5	75	6.09722	63.0833	63	51	25105.7	59.2431	1.12698	0.0595386	0.126984	0.126984	0.936508	1.06349	0.779856	0.873016	2.12698	0.719887	0.140057	1.50714	5.59762	4.96369	0.873214	1.90022	2.12857	0.990642	0.356713	0.5	0.25	2.5	62.5	0.625	1	0.504132	0.166667	1.0077	0.165394	0.0126784	1.00418
0	2.41406	4.258	82.8	100.8	77696	1.22439	7	104	6.74074	92.4444	95	70	40247.9	86.9136	4.45833	0.348886	0.625	0.541667	0.743056	2.125	0.362847	0.5	4.25	0.408854	0.44401	5.09375	10.6354	0.670139	0.323785	1.9281	3.8125	4.0787	0.260344	0.375	0.6875	5.75	40.75	0.368056	2.5	0.756944	0.444444	0.744828	1.39191	0.0545877	1.30672
0	3.21875	4.19644	94.8	121.8	107012	1.39215	19	149	12.642	107.778	100	94	55434.1	274.173	3.13333	1.26869	1.1	0.791667	0.655556	1.79583	0.256076	0.358333	3.59167	0.397859	0.509983	3.25347	5.87847	0.993248	0.594811	1.74468	5.3125	2.59722	0.495202	0.375	0.6875	3.75	20.75	0.590278	1.5	0.543403	0.444444	0.458182	2.17698	0.0993533	1.21499
0	3.21875	3.74317	114	168.5	337747	1.749	27.75	181	18.1016	143.688	148.5	104	174959	463.09	6.45455	4.3164	1.47159	0.886364	0.640862	2.54261	0.140022	0.24053	5.08523	0.296602	0.863788	6.08392	14.7265	0.542223	0.369236	2.42048	7.6481	4.72582	0.335897	0.306122	1.14286	5.14286	75.4286	0.524802	3.85714	0.72613	0.4375	0.345982	4.10785	0.0897387	1.36391
0	4.82812	3.4684	133.2	184.7	632981	1.76391	27	189	16.7812	161.125	166	117	327895	412.943	8.75837	4.34842	1.41258	0.913194	0.619051	2.96232	0.122435	0.209865	5.92463	0.308286	0.900422	9.42478	19.017	0.326931	0.21529	2.54036	12.1004	7.6691	0.193227	0.259259	1.33333	8.44444	153.667	0.323302	4.33333	0.684568	0.375	0.253649	3.77871	0.0926549	1.06569
0	2.41406	4.50963	109.1	143.6	132929	0.954434	25.5	145	12.875	128.125	130.5	107	68859.6	200.109	2.92917	0.248209	0.441667	0.441667	0.779167	1.71667	0.402708	0.495833	3.43333	0.512551	0.243724	2.55357	7.53214	1.06339	0.611607	1.55021	3.35476	1.53115	0.51255	0.555556	0.222222	2	35	0.75	1	0.43	0.375	0.55814	0.447917	0.112305	0.521739
0	2.41406	4.36414	86.4	133.3	103704	1.54879	14.5	162	16.5	111.25	112.5	71	53720.5	586.438	9.50833	4.99624	3.3	1.325	0.595833	3.15417	0.283125	0.391667	6.30833	0.360544	1.36876	9.46429	15.8929	0.338532	0.259167	2.18986	4.30952	7.85714	0.239325	0.25	2.1875	9.75	63.75	0.350278	2.5	0.76	0.5	0.548124	6.75099	0.19249	3.18182
0	2.41406	4.16241	120	146	198265	1.24067	17	151	10.1653	133.727	139	110	102705	141.107	3.84583	1.03389	0.622917	0.539583	0.744097	1.95938	0.294019	0.452083	3.91875	0.418293	0.419556	3.60317	8.13492	0.872878	0.489198	1.87584	4.82341	2.59369	0.400993	0.375	0.6875	3.75	52.5	0.590278	1.5	0.567602	0.363636	0.724024	1.23305	0.046343	1.33627
0	3.21875	4.12266	119.7	138.6	168411	1.29546	9.75	153	7.9	129.3	129.5	108	87239.9	122.61	2.8881	1.23091	0.928571	0.745238	0.657937	1.7131	0.240451	0.336905	3.42619	0.446473	0.383925	3.79732	6.48036	0.899008	0.442535	1.91487	5.60714	3.28529	0.338337	0.375	0.5	4.5	24.5	0.402778	1	0.355903	0.4	0.522876	1.55353	0.0655	1.17252
0	2.41406	4.83611	179	206	220795	0.918296	20	206	9.83333	191.5	189.5	177	114376	126.917	1.79167	0.226526	0.604167	0.604167	0.697917	1.36458	0.388021	0.458333	2.72917	0.537778	0.231111	2.1	4.06667	1.75417	0.725	1.38678	3.45	1.70093	0.560301	0.5	0.25	2.5	16	0.625	1	0.15625	0.333333	0.608108	0.548148	0.118519	0.625
0	2.41406	4.3858	164.4	199.4	309658	1.44662	15	229	15.0864	184.222	186	142	160408	468.617	8.64167	7.85557	2.30833	1.15833	0.602083	2.95417	0.269583	0.416667	5.90833	0.383976	1.29935	9.44048	19.619	0.377235	0.251574	2.21312	4.78571	7.72917	0.230447	0.25	2.1875	9.75	88.5	0.350278	2.5	0.756944	0.444444	0.611255	5.28844	0.1343	3.48033
0	2.41406	4.50439	118.8	205.6	195067	1.95021	58.5	223	33.9592	162.714	148	117	101048	1390.78	8.25	27.6272	4.875	1.83333	0.455903	2.89583	0.173611	0.229167	5.79167	0.271542	2.16454	9.66071	11.7857	0.500982	0.36817	1.93425	5.66667	9.12946	0.334967	0.28	2.16	10	20.2	0.3205	2.6	0.7	0.714286	0.380435	10.7651	0.545773	3.68132
0	1.60938	5.40331	64.9	71.2	18403	-3.20343e-16	2.25	73	2.625	67.75	67	64	9533.08	10.6875	1	0	0	0	1	1	1	1	2	1	0	1	3	3	1	0.459148	1.83333	0.5	0.5	1	0	1	16	1	1	0.0625	0.25	1000000	0	0	0
0	2.41406	4.50439	84.6	102.6	61580	0.591673	13	108	7.34694	93.4286	92	84	31899.5	68.2449	1.41667	0.068287	0.416667	0.416667	0.791667	1.20833	0.4375	0.583333	2.41667	0.68	0.16	1.6	2.9	2.15	0.85	1.48418	2.8	1.33056	0.580556	0.5	0.25	2.5	20	0.625	1	0.513889	0.285714	0.625	0.457143	0.0472303	0.740741
0	2.41406	4.3858	113	155.2	161120	1.89106	27	160	16.1728	132.444	134	97	83463	360.691	7.59167	9.03744	1.22083	0.8875	0.611806	2.70208	0.157188	0.216667	5.40417	0.285077	0.933275	7.95089	12.0625	0.33817	0.259766	2.16105	5.72321	6.92299	0.240165	0.25	1.25	7.5	45.5	0.355903	1.5	0.368056	0.444444	0.761636	3.09093	0.0886145	3.21981
0	1.60937	4.83611	100.5	159.5	108992	1.9183	43.5	163	23.6667	132.333	137	95	56459.8	653.222	9	7.14319	2.89583	1.39583	0.505208	3.05208	0.241319	0.270833	6.10417	0.270833	1.16667	8.75	13.4375	0.321181	0.288628	1.93872	5	7.57812	0.28049	0.25	1.25	7.5	26.25	0.355903	2	0.625	0.666667	0.517241	6.87407	0.236214	2.67857
0	1.60938	4.83611	91	110	61381	1	14.75	111	7.16667	100.833	101.5	91	31796.4	62.8056	2.45833	0.202799	0.645833	0.645833	0.677083	1.64583	0.427083	0.458333	3.1875	0.51	0.245	2.35	4.4875	0.971875	0.6625	1.43548	3.7	1.81562	0.585156	0.555556	0.222222	2	13.6667	0.75	1	0.453704	0.5	0.517241	0.644444	0.161111	0.517241
0	2.41406	4.67327	93.4	117	78676	1.37878	11.5	126	8.77551	105.429	105	88	40755.5	124.245	3.64583	0.481409	0.916667	0.625	0.736111	2.02083	0.395833	0.458333	3.83333	0.394444	0.476111	3.96667	7.31667	0.812037	0.462037	1.92011	3.66667	3.35139	0.388426	0.333333	0.666667	4.66667	25.6667	0.453704	1	0.4375	0.428571	1.09375	1.40381	0.0709427	1.80039
0	2.41406	4.50439	93.4	118.6	77524	1.44882	8.5	136	9.83673	104.286	101	88	40158.8	199.347	3.1875	1.9209	1.0625	0.6875	0.71875	1.78125	0.265625	0.3125	3.5625	0.366939	0.542449	3.70714	5.95714	1.09206	0.529563	2.10365	3.7	3.14464	0.388938	0.333333	0.666667	4.66667	18	0.453704	1.66667	0.407407	0.428571	0.777778	1.67857	0.0932945	1.85714
0	1.60938	5.18188	115	140.2	86269	0.721928	6	141	11.04	130.6	137	103	44688.9	197.44	3.58333	0.0341435	0.208333	0.208333	0.895833	1.89583	0.71875	0.791667	3.79167	0.590278	0.204861	3.125	8.625	0.8125	0.46875	1.20915	2.08333	1.75	0.382812	0.5	0.25	2.5	32.5	0.625	1	0.53125	0.4	1.66667	0.24	0.048	1.33333
0	1.60938	5.40331	71.5	90.7	26938	0.811278	7.5	94	7.25	81.5	82.5	67	13954.4	92.25	3	0.03125	0.5	0.5	0.75	1.75	0.5625	0.625	3.5	0.572917	0.213542	3.0625	6.0625	0.671875	0.484375	1.39154	2.25	2.3125	0.4375	0.5	0.25	2.5	18.5	0.625	1	0.555556	0.5	1	0.5	0.09375	1
0	2.41406	4.06286	84	131	138131	1.49492	33	136	17.686	110.455	114	84	71554.3	357.157	4.26071	4.72943	1.68214	1.03095	0.593056	2.07292	0.189026	0.292262	4.14583	0.374515	0.728521	4.09975	8.47475	0.954931	0.561413	1.77152	6.47222	3.04072	0.497755	0.36	0.56	3.8	33	0.522222	1.4	0.484722	0.454545	0.261623	2.84122	0.228834	0.95552
0	1.60938	4.83611	134.5	162	131072	0.918296	17.75	167	10	147.333	145.5	134	67897.6	138.222	1.79167	0.226526	0.604167	0.604167	0.697917	1.36458	0.388021	0.458333	2.72917	0.537778	0.231111	2.1	4.06667	1.75417	0.725	1.38678	3.45	1.70093	0.560301	0.5	0.25	2.5	16	0.625	1	0.15625	0.333333	0.608108	0.548148	0.118519	0.625
0	2.41406	4.3858	92	143	120719	1.53049	42	143	19.6543	113.889	101	92	62534.6	442.543	4.10833	4.87356	1.29167	0.858333	0.643056	2.00417	0.184097	0.216667	4.00833	0.363644	0.734233	4.20238	7.96131	0.938327	0.544974	2.0358	4.91071	3.26265	0.446635	0.375	0.6875	3.75	26.75	0.590278	1.5	0.368056	0.444444	0.420982	2.18277	0.173201	1.41855
0	2.41406	4.50963	113.6	160	149682	1.5	22.25	167	16	135.5	134	108	77537.9	350	4.41667	1.11511	1.35	0.958333	0.586111	2.1375	0.203229	0.241667	4.275	0.364442	0.52877	4.36905	6.85119	0.530919	0.432209	1.82968	5.47619	3.74851	0.407531	0.36	0.56	3.8	15.6	0.522222	2.2	0.672222	0.625	0.609137	1.95556	0.122222	1.19318
0	2.41406	4.36414	87.2	125.6	89562	1.40564	24.75	134	14.5	104.5	101	83	46394.7	275	2.89583	1.2685	1.5875	1.09583	0.534028	1.76042	0.231319	0.295833	3.52083	0.40749	0.492896	3.27083	4.03274	0.947834	0.587715	1.56706	6.40476	3.12665	0.543981	0.36	0.56	3.8	7.8	0.522222	2.2	0.672222	0.625	0.390789	2.71911	0.131617	1.18839
0	1.60938	5.40331	96.6	113.2	43926	1	13	115	7.5	104.5	103.5	96	22754.4	61.25	2.125	0.25	0.75	0.75	0.625	1.5	0.5	0.5	3	0.5	0.25	2.5	4.375	1.09375	0.625	1	3.5	2.03125	0.507812	0.5	0.25	2.5	10	0.625	2	0.25	0.5	0.75	0.666667	0.166667	0.75
0	3.21875	3.80353	135.1	180.7	354354	1.72441	27	188	17.2041	157.571	161.5	102	183562	482.245	8.61111	5.0222	1.04206	0.836508	0.616005	2.92222	0.162764	0.234127	5.84444	0.313328	0.792759	8.76305	16.4823	0.309834	0.210983	2.27237	8.26422	7.46606	0.194083	0.265306	1.06122	8.42857	62	0.263889	3	0.646825	0.5	0.431607	3.47798	0.0749832	1.82557
0	2.41406	4.36414	170.4	210.8	281492	1.5	21.5	222	14.9375	186.75	179.5	169	145818	310.938	4.47083	0.931744	1.29167	0.9	0.615278	2.15417	0.195243	0.245833	4.30833	0.357426	0.546627	4.3869	7.29762	0.563161	0.437665	1.94223	4.79762	3.65923	0.406291	0.375	0.6875	3.75	25.5	0.590278	1.5	0.578125	0.5	0.587413	1.99206	0.124504	1.17131
0	1.60937	5.40331	107.6	126	54132	0.811278	13	129	8	116	114	107	28041.3	77	1.5	0.03125	0.5	0.5	0.75	1.25	0.5625	0.625	2.5	0.572917	0.213542	1.9375	2.6875	1.51562	0.765625	1.39154	2.25	1.75	0.578125	0.5	0.25	2.5	6.5	0.625	1	0.555556	0.5	1	0.5	0.09375	1
0	3.21875	4.16241	58	101	77209	1.43537	22.5	123	14.9421	81.3636	80	51	39995.6	398.959	3.58036	2.47819	0.767857	0.642857	0.699405	1.875	0.194675	0.294643	3.75	0.387824	0.476667	4.21944	9.77986	1.00247	0.428164	2.07813	5.29306	3.43698	0.322565	0.333333	0.666667	4.66667	63	0.453704	1	0.12963	0.272727	0.551971	1.31793	0.0732532	1.24196
0	2.41406	4.50439	109	145.6	115738	1.84237	15.5	157	13.0612	127.429	127	97	59954.3	295.959	7.25	6.10938	1.5	0.875	0.651042	2.6875	0.25	0.3125	5.375	0.28542	0.922415	7.39048	11.5905	0.375116	0.293171	2.16689	4.56667	6.34048	0.272685	0.25	1.25	7.5	28.5	0.355903	1.5	0.590278	0.571429	1.10526	3.21905	0.0907029	3.55102
0	4.02344	4.0199	112.4	162.4	233007	1.73815	28	167	17.6095	132.077	135	85	120702	479.302	8.00397	4.14807	1.38046	0.976687	0.578952	2.83606	0.157544	0.243056	5.67212	0.324609	0.718246	7.71031	13.1512	0.302581	0.22957	2.07689	9.12727	6.82736	0.217209	0.306122	0.816327	6.71429	46.1429	0.290675	3	0.648571	0.538462	0.350225	4.16688	0.0913204	1.48608
0	3.21875	4.19644	43.4	63	28346	0.918296	15	71	8.2963	55.3333	60	41	14683.7	87.7778	2.925	0.265733	0.4625	0.4625	0.76875	1.71875	0.394687	0.51875	3.4375	0.512813	0.243594	2.66875	8.72708	1.10208	0.582812	1.63001	3.5125	1.56157	0.478458	0.555556	0.222222	2	49.6667	0.75	1	0.425926	0.333333	0.509503	0.436155	0.102528	0.481651
0	3.21875	3.93838	124.6	195.4	323448	2.13394	39	207	22.2485	155.231	154	110	167552	784.024	8.89583	14.5358	1.99306	1.15972	0.552083	2.95486	0.106047	0.170139	5.90972	0.23878	1.39226	8.86553	13.6553	0.353019	0.289414	2.50437	8.70076	7.89536	0.276319	0.21875	1.73438	8.625	33	0.35309	3.75	0.695312	0.615385	0.483336	6.85631	0.101561	3.1427
0	2.41406	4.3858	113	144.2	148182	0.991076	22	149	12.6173	127.556	123	105	76760.9	194.247	2.4625	0.407785	0.5375	0.5375	0.73125	1.57708	0.28441	0.339583	3.15417	0.538141	0.230929	2.10268	5.26339	1.2567	0.72433	1.51487	4.09821	1.3125	0.591239	0.555556	0.222222	2	27	0.75	1.66667	0.375	0.333333	0.382127	0.58154	0.138677	0.395667
0	1.60938	4.78621	99.4	155	108968	1.84237	37.5	158	20.9388	122.571	115	94	56447.3	543.102	7.20833	5.51984	2.66667	1.43333	0.476389	2.725	0.199722	0.2375	5.45	0.305839	1.0788	7.52381	10.0238	0.333416	0.294354	1.93221	5.66667	6.89881	0.284588	0.28	1.04	6.8	18.8	0.334722	2.6	0.7	0.714286	0.41543	6.53952	0.214286	2.30904
0	2.41406	4.3858	113.6	141.8	155240	0.918296	24	149	11.7778	130.667	137	108	80417	175.111	2.98333	0.0677435	0.508333	0.508333	0.745833	1.74583	0.38875	0.491667	3.49167	0.507653	0.246173	2.66071	7.73214	0.901786	0.584821	1.53228	4.19048	1.86161	0.534877	0.625	0.1875	1.75	36.75	0.8125	2.5	0.756944	0.444444	0.410959	0.540741	0.12716	0.38835
0	3.21875	4.10435	109.3	167.5	221779	2.05459	31.5	182	22.5833	133.25	130.5	81	114885	726.021	8.875	12.5549	2.51042	1.17708	0.582118	2.98438	0.128038	0.21875	5.96875	0.260956	1.30534	9.17626	13.5288	0.369736	0.236408	2.44127	7.11212	8.21159	0.210792	0.2	2	11	54.2	0.292722	1.4	0.480222	0.416667	0.45677	7.28256	0.104425	3.07987

## Sheet: Sheet1
			original	original	original	original	original	original	original	original	original	original	original	original	original	original	original	original	original	original	original	original	original	original	original	original	original	original	original	original	original	original	original	original	original	original	original	original	original	original	original	original	original	original	original	original	original
			shape	shape	firstorder	firstorder	firstorder	firstorder	firstorder	firstorder	firstorder	firstorder	firstorder	firstorder	firstorder	firstorder	glcm	glcm	glcm	glcm	glcm	glcm	glcm	glcm	glcm	glrlm	glrlm	glrlm	glrlm	glrlm	glrlm	glrlm	glrlm	glrlm	glrlm	glszm	glszm	glszm	glszm	glszm	glszm	glszm	glszm	ngtdm	ngtdm	ngtdm	ngtdm
			Maximum2DDiameterColumn	SurfaceVolumeRatio	10Percentile	90Percentile	Energy	Entropy	InterquartileRange	Maximum	MeanAbsoluteDeviation	Mean	Median	Minimum	TotalEnergy	Variance	Autocorrelation	ClusterProminence	Contrast	DifferenceAverage	Id	JointAverage	JointEnergy	MaximumProbability	SumAverage	GrayLevelNonUniformityNormalized	GrayLevelVariance	HighGrayLevelRunEmphasis	LongRunHighGrayLevelEmphasis	LongRunLowGrayLevelEmphasis	LowGrayLevelRunEmphasis	RunEntropy	RunLengthNonUniformity	ShortRunHighGrayLevelEmphasis	ShortRunLowGrayLevelEmphasis	GrayLevelNonUniformityNormalized	GrayLevelVariance	HighGrayLevelZoneEmphasis	LargeAreaHighGrayLevelEmphasis	LowGrayLevelZoneEmphasis	SizeZoneNonUniformity	SmallAreaEmphasis	ZonePercentage	Coarseness	Complexity	Contrast	Strength
陈传胜	1	1	2.41406	4.12266	36.7	78.1	33277	1.37095	31.5	79	16.84	54.7	47.5	25	17238.1	335.61	3.11905	3.85417	1.60119	0.975	0.616865	1.78393	0.171978	0.254762	3.56786	0.422454	0.651042	3.36806	5.74306	1.44232	0.647184	1.84283	5.75694	2.85532	0.529417	0.333333	0.666667	4.66667	29.3333	0.453704	1.66667	0.175926	0.3	0.28463	2.77	0.169244	1.10924
陈传胜	2	1	3.21875	4.06286	51	91	53397	1.32218	29.5	93	14.7934	67.7273	67	48	27660.6	267.289	5.83899	0.905923	0.79256	0.63006	0.712054	2.42366	0.218797	0.267262	4.84732	0.430335	0.401612	5.16667	13.1905	0.535053	0.302249	1.97755	4.5873	3.31944	0.253968	0.333333	0.666667	4.66667	96.3333	0.453704	1	0.363426	0.272727	0.414275	1.69749	0.0758959	1.02113
周红梅	3	1	3.21875	3.50598	50.4	93.4	71244	1.37528	21.5	104	13.7333	66.8	61	48	41057.5	287.36	5.98737	2.68966	1.1976	0.818182	0.654146	2.45455	0.191877	0.33649	4.90909	0.439554	0.571824	5.82718	12.8845	0.614965	0.273563	2.2607	7.34405	4.78005	0.233038	0.25	1.25	7.5	124.5	0.355903	1.5	0.530278	0.266667	0.274989	3.55793	0.0485578	1.49484
周红梅	4	1	4.02344	3.55789	73.1	116.9	171032	1.48068	27.75	121	14.1111	96	94.5	65	98564.8	285.778	5.16812	3.34052	0.670717	0.540589	0.751394	2.24302	0.176399	0.263374	4.48604	0.36274	0.546471	5.23805	15.896	0.812047	0.354887	2.50965	5.9053	3.52263	0.278065	0.375	0.6875	5.75	149.5	0.368056	1	0.288628	0.222222	0.389189	1.18141	0.071998	0.954743
刘继平	5	1	3.21875	3.93838	81.4	131.8	162077	1.82625	26	138	17.1598	109.923	117	73	83958.7	384.379	8.70238	5.1055	1.4246	0.972222	0.589286	2.9504	0.140401	0.204365	5.90079	0.296677	0.836765	8.14053	14.2939	0.299135	0.228822	2.29018	8.0553	6.85218	0.21433	0.333333	0.888889	6.33333	65.6667	0.320602	2	0.566852	0.461538	0.372137	4.19394	0.106906	1.60917
洪文慧	6	1	3.16667	6.79591	919.8	1257.4	31085543	3.78347	228	1277	113.424	1107.8	1118	877	3.37695e+06	16200.9	128.951	6529.79	37.5874	4.75556	0.299916	11.1723	0.0353829	0.0566467	22.3446	0.0771706	26.0576	118.855	143.745	0.0803062	0.0795458	3.8598	22.1286	112.633	0.0793557	0.0748299	26.1406	108	243.952	0.08999	15.6667	0.886243	0.84	0.139352	380.233	0.966446	16.4087
洪文慧	7	1	2.63889	7.71323	871	1392	16566267	3.39275	230	1455	163.953	1110.54	1146	732	1.79966e+06	41032.6	347.224	27710	146.049	10.2205	0.177135	18.9129	0.0772321	0.0876488	37.8259	0.0997493	67.3865	318.255	343.255	0.0852401	0.0850839	3.39913	12.2917	312.005	0.0850448	0.0972222	70.4097	313.25	413.25	0.09014	10.1667	0.9375	0.923077	0.110115	924.702	9.59861	30.4726
陈永明	8	1	2.35885	7.14358	634.8	777	3378855	2.23593	81	801	51.0204	692.143	668	630	919138	3631.84	11.5625	176.958	18.6667	3.79167	0.26875	3.75	0.182292	0.197917	7.5	0.22449	6.20408	17	17	0.379216	0.379216	2.23593	7	17	0.379216	0.22449	6.20408	17	17	0.379216	7	1	1	0.20649	49.2659	1.90406	6.29059
陈永明	9	1	5.50398	5.97976	536.6	875.6	13480398	3.57366	178	910	105.872	722.8	717	438	3.66702e+06	16776.1	186.145	5625.72	58.5576	6.21161	0.226168	13.7864	0.0406691	0.0794986	27.5728	0.0948942	26.4817	182.651	216.23	0.0544815	0.0539192	3.65016	23.3182	178.347	0.0538176	0.0867769	26.9669	175.364	309.682	0.0587759	18.2727	0.925505	0.88	0.103529	478.58	1.33001	15.2421
梅爱华	10	1	1.58333	8.41363	728.2	816.6	4149997	2.23593	39.5	864	32.5306	768.714	763	721	450832	1935.06	10.9375	54.9745	9.91667	2.5	0.389335	3.45833	0.169271	0.177083	6.91667	0.223923	3.33787	13.5238	14.0238	0.289454	0.258204	2.23985	6.33333	13.3988	0.250391	0.222222	3.55556	14.6667	16.6667	0.259188	4.33333	0.875	0.857143	0.418327	21.9167	0.572983	6.16399
李智	11	1	3.69444	6.47353	582.8	849.1	17868012	3.57494	139	898	84.3841	718.235	741	534	1.94108e+06	9667.83	72.7386	3584.31	22.4402	3.86785	0.307763	8.24116	0.0262665	0.0391414	16.4823	0.0986842	15.3287	82.854	95.8868	0.0774308	0.0686919	3.66389	29.0202	79.5958	0.0665072	0.0973937	15.5995	83.8148	151.889	0.0717156	17.2963	0.828189	0.794118	0.128621	211.159	0.452168	10.8033
李智	12	1	4.22222	6.47353	585.9	1046.8	23332626	4.0941	246.5	1212	140.931	810.412	777.5	537	2.53472e+06	29486.5	180.814	28812.6	70.0336	6.52098	0.254394	13.0851	0.0244712	0.048576	26.1702	0.0638545	47.3613	193.309	225.776	0.101887	0.0759565	4.1643	28.756	185.918	0.0695845	0.0621302	49.7352	200.269	387.5	0.0629596	16.1538	0.816239	0.764706	0.106069	943.533	1.45186	23.2283
罗新萍	13	1	2.41406	6.58113	139.9	165.4	93907	1	14.25	169	10.25	152.75	153	136	48645.5	144.187	2.66667	0	0.666667	0.666667	0.666667	1.66667	0.666667	0.666667	3.33333	0.518519	0.240741	2.33333	3.66667	0.75	0.666667	0.972765	3.22222	2	0.645833	0.555556	0.222222	2	6	0.75	1.66667	0.75	0.75	0.631579	0.791667	0.197917	0.631579
陈小洲	14	1	4.75	6.59472	449.9	678.2	11295060	3.3997	110.25	733	75.699	568.059	582.5	329	1.22703e+06	9516.82	104.06	3721.55	27.7932	4.17572	0.308538	10.1017	0.0280594	0.0507765	20.2033	0.103255	15.2867	118.17	146.043	0.122415	0.0959228	3.58825	27.6568	111.201	0.0892997	0.0976331	15.0251	117.346	254	0.0871238	16.1538	0.816239	0.764706	0.115337	207.171	0.64891	8.57613
陈小洲	15	1	4.22222	6.29381	496.5	724.5	18589835	3.61199	155.25	780	78.1267	629.196	656	401	2.01949e+06	8239.68	113.328	2169.56	17.7177	3.30312	0.359228	10.5346	0.0227881	0.0553074	21.0692	0.0914939	13.7982	102.897	147.428	0.046911	0.0437626	3.91588	34.4981	92.0141	0.0431683	0.08	14.2456	87.6333	415.8	0.0572506	16.8667	0.771991	0.652174	0.108599	212.51	0.334178	8.43986
张贵清	16	1	2.15	8.05901	560.6	723.4	2023535	2.32193	101	753	67.36	631.8	600	549	457296	5535.76	28.1667	170.769	32.0833	5.08333	0.209226	5.83333	0.291667	0.291667	11.6667	0.2	10	35	35	0.240804	0.240804	2.32193	5	35	0.240804	0.2	10	35	35	0.240804	5	1	1	0.218182	87.3833	4.58333	8.72727
张贵清	17	1	2.86667	6.61324	651	924	7301998	2.91398	188.5	1030	105.256	805.818	778	633	1.65017e+06	14475.1	81.4637	3198.64	57.4512	6.24643	0.249162	9.30655	0.0886471	0.115774	18.6131	0.140248	22.9347	87.4341	92.3091	0.142691	0.136473	2.91795	9.6	86.2153	0.134918	0.135802	25.1358	96.4444	118.111	0.152058	5.88889	0.833333	0.818182	0.138739	250.526	3.92829	14.36
甘永红	18	1	1.60938	5.09287	105.8	118.4	50766	-3.20343e-16	9	119	5.5	112.5	113.5	104	29256.2	35.25	1	0	0	0	1	1	1	1	2	1	0	1	3	3	1	0.459148	1.83333	0.5	0.5	1	0	1	16	1	1	0.0625	0.25	1000000	0	0	0
甘永红	19	1	3.21875	3.60557	79.9	117.7	141052	1.26381	18	126	12.3265	99.2857	96	75	81287.5	217.49	2.43294	1.86429	0.844444	0.661905	0.699471	1.55278	0.196699	0.313095	3.10556	0.424504	0.437438	2.95455	5.23409	1.80006	0.619949	2.19002	6.23636	2.53578	0.476042	0.375	0.5	4.5	35.25	0.402778	1.5	0.519531	0.285714	0.331548	1.74018	0.0683714	1.07492
郭东红	20	1	1.60938	4.60269	76.2	106	45086	1.52193	4	110	12.24	93.6	99	63	29194.2	256.24	5.33333	0.546296	1.08333	0.916667	0.569444	2.33333	0.381944	0.395833	4.66667	0.353333	0.586667	5.21667	8.46667	0.462037	0.371759	1.53769	4.16667	4.40417	0.34919	0.333333	0.666667	4.66667	17.6667	0.453704	1.66667	0.5	0.6	0.75	2.25	0.152444	1.86122
郭东红	21	1	3.21875	3.5122	120	184	247340	1.98083	45	187	24.6942	147.636	136	112	160158	688.959	6.74464	7.43279	2.16637	1.20268	0.541047	2.60729	0.132514	0.174256	5.21458	0.264362	1.17497	6.46307	10.1568	0.482102	0.415305	2.18209	7.9125	5.53963	0.398606	0.333333	1.33333	5.33333	30.6667	0.570602	2.33333	0.578704	0.545455	0.365059	5.53474	0.189856	1.75415
苏立琼	22	1	3.95591	5.79064	78.4	1273.8	11528587	3.96982	463	2119	417.329	611.118	521	0	2.47233e+06	304687	487.727	2.95184e+06	746.134	20.5073	0.12535	21.7851	0.0479311	0.0591811	43.5702	0.064933	487.114	1123.24	1128.91	0.0806701	0.0802827	3.97736	16.2812	1121.82	0.0801858	0.0625	499.984	1169.5	1192.19	0.0836066	14.125	0.953125	0.941176	0.0585841	7968.2	66.1175	112.668
吴玺劳	23	1	4.02344	3.69772	68.5	142	222661	2.15522	49.25	152	25.7222	107.5	111	61	115342	813.806	10.4318	16.6618	2.43881	1.24301	0.549126	3.22115	0.101362	0.19493	6.44231	0.226821	1.49556	8.91544	19.9838	0.376511	0.310081	2.59019	10.9961	7.08585	0.297136	0.24	1.64	7.4	71.8	0.407472	5.2	0.738889	0.555556	0.270696	8.65588	0.138275	1.98187
刘剑清	24	1	4.75	6.61894	409.6	901.3	13815325	4.12323	321.75	989	162.033	650.367	655	286	1.50082e+06	37534	325.213	47254.7	74.9486	7.23905	0.197252	17.5214	0.0245075	0.0397619	35.0429	0.0621723	58.7287	295.293	334.475	0.0455346	0.0453074	4.14292	27.8387	285.498	0.0452506	0.0617284	57.358	279.037	443.259	0.048808	21.6667	0.916667	0.9	0.110178	990.918	1.7923	30.5373
朱云龙	25	1	4.95935	6.06129	408.3	588.5	5133397	2.81104	92.75	612	64.5	476.136	471.5	301	1.13373e+06	6630.39	67.1592	905.418	18.8284	3.59512	0.321811	8.18611	0.0481377	0.0676435	16.3722	0.159039	10.6996	66.9364	85.5739	0.11917	0.115752	2.97533	17.8	62.277	0.114898	0.15625	11.7344	62.5	165.812	0.143816	8.625	0.756944	0.727273	0.125298	101.073	1.00338	6.31649
朱云龙	26	1	2.83392	6.71389	438	746	4480070	2.84535	240.5	895	128.529	620.727	663	396	989444	21976.7	141.67	9850.55	65.3286	6.85476	0.212922	11.8845	0.0901219	0.120238	23.769	0.157769	35.044	138.693	153.393	0.116859	0.116476	2.84562	10.3	135.018	0.116381	0.16	36.49	134.5	193.3	0.124626	8.2	0.925	0.909091	0.163251	288.252	6.17445	23.147
蓝翠云	27	1	3.16667	6.5088	620.3	998.4	20625196	3.94839	212.75	1134	125.707	815.4	837	518	2.2406e+06	22629.4	212.012	16096.7	52.464	5.79508	0.251956	14.3412	0.0265253	0.0499894	28.6824	0.0688854	37.5338	206.954	232.303	0.0482838	0.0478405	4.04029	27.1059	200.617	0.0477297	0.0680473	40.966	203.038	373.346	0.0528466	22.2308	0.935096	0.866667	0.118653	635.383	1.21322	20.7191
蓝翠云	28	1	2.63889	7.10495	659	950	10085435	3.32782	233.5	1045	121.227	782.312	725	558	1.09562e+06	18326.8	126.641	8381.93	53.4068	6.05227	0.242115	11.1443	0.0537603	0.0840909	22.2886	0.108455	28.9832	125.816	142.316	0.0851872	0.0819715	3.37029	13.85	121.691	0.0811675	0.100592	30.071	128.538	204.692	0.092393	8.38462	0.826923	0.8125	0.121513	377.446	2.42011	18.105
叶维莲	29	1	2.11111	7.28039	564.9	778.6	6422382	3.18201	128.5	820	75.5918	671.857	699	535	697691	7349.55	50.4698	706.472	22.5246	3.93254	0.286806	7.16786	0.064246	0.094246	14.3357	0.119615	11.8639	51.4256	62.0923	0.137429	0.134825	3.19941	13.0417	50.2404	0.134535	0.111111	12.9097	49.9167	92.5833	0.149129	10.1667	0.925926	0.857143	0.218247	140.634	0.782745	11.4422
叶维莲	30	1	2.63889	6.73612	569.8	946.5	14761724	3.88684	223.5	992	123.333	770	781.5	406	1.60363e+06	22171.8	283.913	14160.1	43.7639	5.24177	0.250974	16.6037	0.0324985	0.0497205	33.2074	0.0724513	35.1603	269.668	301.882	0.0492521	0.0488422	3.91515	21.8626	261.614	0.0487398	0.0702948	35.9909	263.857	402.429	0.0535803	15.8571	0.892857	0.875	0.16063	518.684	1.12299	25.5141
刘烈才	31	1	4.22222	6.64772	504.9	695.3	11099234	3.32409	133.25	808	73.1822	601.733	596	422	1.20576e+06	7891.46	83.6548	2019.96	24.1031	3.98674	0.30306	9.12242	0.0299683	0.0457684	18.2448	0.111137	12.7395	85.4093	102.655	0.0563768	0.054139	3.50029	25.7553	81.0978	0.0535796	0.104167	13.5208	81.5833	173.083	0.061627	15.75	0.837963	0.8	0.105198	207.541	0.580012	8.63381
聂华保	32	1	2.41406	4.36414	118.5	144.5	139236	0.811278	14.75	148	9	131.5	130	115	72126.7	112.25	3.30833	0.0726263	0.345833	0.345833	0.827083	1.82708	0.493437	0.654167	3.65417	0.528889	0.235556	2.85	10.05	0.9875	0.5375	1.59994	2.58333	1.49444	0.452778	0.555556	0.222222	2	48.6667	0.75	1.66667	0.675926	0.375	0.739762	0.337946	0.0734933	0.637813
聂华保	33	1	2.41406	4.28882	155.7	169.3	260374	0.468996	5.5	172	5.16	161.2	162	144	134878	51.96	3.74524	0.0604216	0.127381	0.127381	0.93631	1.93631	0.778308	0.872619	3.87262	0.687361	0.156319	3.4125	18.6458	1.34896	0.396875	1.51022	2.46667	1.41782	0.272208	0.5	0.25	2.5	162.5	0.625	1	0.506173	0.2	1.57835	0.126714	0.0143357	1.25561
贾天明	34	1	3.16667	6.9128	471.8	638.4	6247411	3.17095	101	688	58.75	554.25	558.5	396	678683	5177.49	66.0787	1088.94	11.9296	2.78599	0.376244	8.0255	0.0486853	0.0813187	16.051	0.117741	8.5619	66.5629	88.2558	0.0812985	0.0771562	3.38619	15.1096	61.1396	0.0761206	0.112245	10.2041	63.2857	182.571	0.0962786	7.71429	0.765873	0.7	0.240902	84.1843	0.360725	10.0565
贾天明	35	1	4.22222	6.53481	417.2	678.8	10550121	3.46502	135.75	741	87.5723	563.781	582.5	328	1.1461e+06	11842	110.486	7600.47	16.8398	3.16317	0.377788	10.0182	0.0305132	0.0566032	20.0364	0.0962108	17.6069	120.474	158.794	0.115625	0.0747385	3.69651	23.608	111.071	0.0652114	0.0975057	14.6304	118.476	326.857	0.061021	9.85714	0.698743	0.65625	0.177509	134.729	0.571815	14.8531
尹作英	36	1	3.16667	6.60594	554.1	755.1	13336810	3.40291	135.75	846	69.6222	661.667	672	512	1.44883e+06	6757.56	60.2371	1325.13	15.842	3.05433	0.391285	7.66313	0.032634	0.0666617	15.3263	0.100875	10.9457	58.5107	87.5452	0.0982597	0.0829666	3.71445	20.5	51.2521	0.0791433	0.0925926	12.3488	56.0556	255.944	0.101266	7.88889	0.681235	0.6	0.151007	136.162	0.395239	8.1664
王光锡	37	1	1.60938	6.41547	145	171.4	74834	1.58496	16.5	176	12.4444	157.333	153	143	38765.3	190.889	3.66667	0	2	1.33333	0.444444	2	0.5	0.5	4	0.333333	0.666667	4.66667	4.66667	0.453704	0.453704	1.58496	3	4.66667	0.453704	0.333333	0.666667	4.66667	4.66667	0.453704	3	1	1	1	3	0.222222	2.66667
陈安清	38	1	3.57589	5.43248	69.6	105.2	122180	1.43156	11.75	112	11.449	92.2857	97	59	26038.6	210.49	4.94643	2.18277	0.778571	0.653571	0.694048	2.21786	0.190603	0.271429	4.43571	0.381263	0.495782	5.4072	11.5634	0.646596	0.320128	2.18432	6.52462	4.10803	0.253505	0.36	0.56	5.4	53.8	0.344444	1.4	0.327778	0.357143	0.383737	1.55519	0.0823473	0.919037
陈安清	39	1	1.78795	5.87391	132.2	165	207323	0.918296	13	165	10.5926	151.222	155	125	44184	167.728	2.96667	0.263744	0.441667	0.441667	0.779167	1.72917	0.392083	0.508333	3.45833	0.512813	0.243594	2.66875	8.72708	1.10208	0.582812	1.63001	3.5125	1.56157	0.478458	0.555556	0.222222	2	49.6667	0.75	1	0.425926	0.333333	0.517241	0.42963	0.100412	0.491803
祝翠华	40	1	4.22222	6.9383	465.5	761.5	9660889	3.69026	214.5	777	102.538	598.5	579.5	413	1.0495e+06	13370.4	95.0347	4084.8	38.6466	5.13841	0.248207	9.67711	0.0317534	0.048312	19.3542	0.0883787	20.4554	89.2223	102.722	0.0744105	0.0741438	3.73686	24.54	85.8473	0.0740772	0.0902778	18.776	80.7917	155.792	0.0784716	22.0833	0.962963	0.923077	0.110158	370.656	0.781937	12.701
祝翠华	41	1	3.16667	6.63574	566.5	843.5	13828893	3.68642	130.5	917	89.3491	719.962	721.5	428	1.50229e+06	13535.9	175.621	7705.84	28.5594	4.01277	0.334038	13.083	0.0407722	0.0925697	26.1659	0.0813748	23.8305	173.878	219.736	0.0560729	0.0541392	3.93058	21.1894	165.82	0.05382	0.075	28.3275	175.95	427.15	0.0636661	16.3	0.907556	0.769231	0.181407	321.048	0.660951	20.3738
刘先礼	42	1	4.75	6.23819	509.9	937	30432488	4.26238	218.25	1075	132.958	778.25	798	354	3.30601e+06	28337.1	370.235	25803	63.6194	6.15402	0.253199	19.0903	0.0171556	0.0359977	38.1805	0.0585253	46.8098	353.323	438.505	0.0328543	0.0324571	4.43393	41.2488	334.877	0.0323724	0.0545694	50.881	335.538	728.128	0.0374487	28.3846	0.873932	0.8125	0.0856551	1145.85	0.879606	22.0117
刘先礼	43	1	3.69444	6.36151	454.7	911.8	19487956	4.34623	303.5	1001	150.371	693.947	714.5	348	2.11706e+06	31278	292.96	32891.6	59.754	5.78456	0.256335	16.6596	0.0189316	0.0295219	33.3191	0.0551313	52.0396	284.918	320.377	0.0382899	0.0375633	4.39953	33.6667	276.054	0.0373817	0.0527344	55.3818	285.094	444.656	0.0420084	22.25	0.859375	0.842105	0.133475	995.184	0.853914	32.9884
孟中明	44	1	4.22222	6.42525	311.2	518	6859527	3.63519	122	616	68.3421	416.342	416	261	745179	7173.12	56.7047	2817.62	18.7627	3.45566	0.320056	7.28163	0.0243027	0.0385974	14.5633	0.0889254	11.4149	64.0657	68.7549	0.107729	0.0827558	3.72375	33.6381	62.8934	0.0765124	0.0878906	11.4375	67.6875	89.1562	0.0663849	22.25	0.859375	0.842105	0.136762	171.844	0.303623	8.76864
王贵奎	45	1	5.27778	5.95441	412	645.2	22087660	3.72766	152	743	76.3458	520.759	511	321	2.39948e+06	8400.18	89.4499	3029.29	9.63436	2.42745	0.420229	9.08355	0.0186874	0.052599	18.1671	0.0823437	13.5145	99.3361	152.135	0.0409384	0.0329404	4.22203	52.8235	88.6943	0.0311124	0.0746692	14.4939	102.283	568.913	0.0400461	19.8261	0.667841	0.582278	0.122425	153.974	0.143769	11.5056
王贵奎	46	1	3.16667	6.6573	539	674	11977111	2.82922	73	717	41.9272	619.452	632	509	1.30112e+06	2638.12	28.4879	185.892	8.41318	2.32333	0.412559	5.34011	0.042717	0.0935606	10.6802	0.152423	4.27009	30.8125	45	0.108119	0.0987926	3.18247	23.4286	28.1089	0.0969389	0.136364	4.93595	28.5909	103.045	0.118414	15	0.840278	0.709677	0.136623	53.7466	0.202877	3.41081
周桂娃	47	1	4.02344	3.33207	109.8	200.8	487533	2.09486	28	213	28.3945	164.765	174	56	315688	1531	29.6632	35.8047	4.26989	1.5684	0.505837	5.46514	0.0958403	0.149257	10.9303	0.249236	2.63371	28.5991	44.4887	0.124028	0.108387	2.53509	11.2493	24.6267	0.104477	0.209877	3.7284	26.5556	153.556	0.155399	3.44444	0.627901	0.529412	0.280247	13.9307	0.288492	3.70053
周桂娃	48	1	2.41406	4.25254	96.5	143	97283	1.25163	26.25	144	19.3333	125.5	137	86	62992.9	463.583	6.72917	1.95801	1.02083	0.645833	0.739583	2.59375	0.390625	0.541667	5.1875	0.4075	0.66375	6.075	15.525	0.459028	0.342361	1.71096	2.7	3.7125	0.313194	0.333333	0.666667	4.66667	49.6667	0.453704	1.66667	0.6875	0.5	0.882353	1.53778	0.103704	2.8125
徐光珍	49	1	2.83392	7.36724	513.5	663.1	2842915	2.5	97.25	675	56.2188	592.625	610	475	627871	4159.98	35.1458	338.007	11.8958	3.0625	0.290724	5.90625	0.142361	0.15625	11.8125	0.1875	6.73438	35.625	35.625	0.16577	0.16577	2.5	8	35.625	0.16577	0.1875	6.73438	35.625	35.625	0.16577	8	1	1	0.313316	48.4944	1.01764	9.73346
李双	50	2	1.60938	5.40331	240.9	271.3	266106	0.811278	16	274	12	257.5	261	234	137848	220.25	3	0.03125	0.5	0.5	0.75	1.75	0.5625	0.625	3.5	0.572917	0.213542	3.0625	6.0625	0.671875	0.484375	1.39154	2.25	2.3125	0.4375	0.5	0.25	2.5	18.5	0.625	1	0.555556	0.5	1	0.5	0.09375	1
李双	51	2	1.60938	5.40331	209.6	256.1	220525	1	39.75	257	21.75	233.75	236	206	114236	492.188	3.5	4	3	1.5	0.5	2	0.5	0.5	4	0.5	1	5	8.75	0.972222	0.555556	1	3.5	4.0625	0.451389	0.5	1	5	20	0.555556	2	0.25	0.5	0.375	2.66667	1.33333	1.5
放射科阿姨	52	2	1.60938	5.40331	107.3	189.7	95638	2	41	202	32	149.5	152	92	49542.2	1559.25	10.625	24.25	9.75	2.75	0.3125	3.5	0.375	0.375	7	0.25	3.25	15.5	15.5	0.300347	0.300347	2	4	15.5	0.300347	0.25	3.25	15.5	15.5	0.300347	4	1	1	0.5	18.6667	1.08333	6.5
放射科阿姨	53	2	2.41406	4.78621	83	143.6	97297	2.23593	34.5	155	23.7959	114.429	119	62	50401.6	805.673	10.7917	12.3484	3.66667	1.54167	0.483333	3.33333	0.188368	0.239583	6.66667	0.223356	1.64357	11.3393	14.4643	0.267847	0.246146	2.24378	5.66667	10.558	0.24072	0.2	2	11	26	0.292722	2.6	0.7	0.714286	0.933333	7.85714	0.151409	5.22648
肖姣芝	54	2	3.21875	4.14352	189	287	1262427	2.14179	42	299	30.5578	242.429	247	175	653959	1343.96	11.0425	32.142	2.95405	1.36149	0.541057	3.28979	0.079267	0.112288	6.57957	0.238188	1.84499	11.5373	20.2829	0.375611	0.282448	2.70147	12.9105	9.64717	0.260315	0.22314	2.08264	10.5455	65.5455	0.344394	4.09091	0.612374	0.52381	0.190012	10.209	0.196484	1.63716
李昌敏	55	2	2.41406	4.71288	104.2	147.4	78268	1.37095	9	163	16.24	123.2	117	97	45105.4	475.36	5	0.046875	2.875	1.375	0.53125	2.3125	0.375	0.4375	4.625	0.4075	1.07375	6.025	7.525	0.470313	0.376563	1.68548	3.75	5.65	0.353125	0.333333	1.55556	7	17.6667	0.4375	1.66667	0.703704	0.6	0.631579	4.16667	0.336	2.89524
李昌敏	56	2	2.41406	4.22161	104.6	150.8	113719	1.55666	28	152	15.3061	126.143	126	101	65535.6	333.551	3.8125	4.51562	1.375	0.875	0.645833	1.9375	0.25	0.3125	3.875	0.347151	0.678678	4.30655	7.18155	1.01257	0.507358	1.84831	4.54167	3.5878	0.381056	0.333333	0.666667	4.66667	20.3333	0.453704	1.66667	0.203704	0.428571	0.509091	2.34524	0.187237	1.46218
王军	57	2	1.60938	5.40331	163.7	173	114679	-3.20343e-16	5.25	173	4.125	169.25	171.5	161	59405.7	24.1875	1	0	0	0	1	1	1	1	2	1	0	1	3	3	1	0.459148	1.83333	0.5	0.5	1	0	1	16	1	1	0.0625	0.25	1000000	0	0	0
王军	58	2	2.41406	4.50439	149.4	173.4	182636	1.14883	14	177	9.30612	161.143	160	141	94608.7	123.837	4.3125	0.369466	0.770833	0.645833	0.697917	2.09375	0.282986	0.416667	4.1875	0.47	0.366667	4.36667	8.16667	0.599537	0.362037	1.8572	3.66667	3.63889	0.316551	0.333333	0.666667	4.66667	36.6667	0.453704	1.66667	0.68	0.428571	1.02439	1.24603	0.045805	1.69731
彭银艳	59	2	2.41406	4.28975	67.4	92.9	47956	1	10.5	95	8.375	76.75	74.5	66	24842.1	103.938	2.4	0.415308	0.5375	0.5375	0.73125	1.55625	0.280938	0.31875	3.1125	0.507551	0.246224	2.37143	5.8	1.24643	0.657143	1.78433	3.5381	1.73651	0.52371	0.5	0.25	2.5	40	0.625	2	0.0625	0.25	0.489796	0.510417	0.127604	0.489796
郭志勇	60	2	3.21875	4.10435	53	73	48465	0.413817	9.5	75	6.09722	63.0833	63	51	25105.7	59.2431	1.12698	0.0595386	0.126984	0.126984	0.936508	1.06349	0.779856	0.873016	2.12698	0.719887	0.140057	1.50714	5.59762	4.96369	0.873214	1.90022	2.12857	0.990642	0.356713	0.5	0.25	2.5	62.5	0.625	1	0.504132	0.166667	1.0077	0.165394	0.0126784	1.00418
郭志勇	61	2	2.41406	4.258	82.8	100.8	77696	1.22439	7	104	6.74074	92.4444	95	70	40247.9	86.9136	4.45833	0.348886	0.625	0.541667	0.743056	2.125	0.362847	0.5	4.25	0.408854	0.44401	5.09375	10.6354	0.670139	0.323785	1.9281	3.8125	4.0787	0.260344	0.375	0.6875	5.75	40.75	0.368056	2.5	0.756944	0.444444	0.744828	1.39191	0.0545877	1.30672
宋琼	62	2	3.21875	4.19644	94.8	121.8	107012	1.39215	19	149	12.642	107.778	100	94	55434.1	274.173	3.13333	1.26869	1.1	0.791667	0.655556	1.79583	0.256076	0.358333	3.59167	0.397859	0.509983	3.25347	5.87847	0.993248	0.594811	1.74468	5.3125	2.59722	0.495202	0.375	0.6875	3.75	20.75	0.590278	1.5	0.543403	0.444444	0.458182	2.17698	0.0993533	1.21499
周张洪	63	2	3.21875	3.74317	114	168.5	337747	1.749	27.75	181	18.1016	143.688	148.5	104	174959	463.09	6.45455	4.3164	1.47159	0.886364	0.640862	2.54261	0.140022	0.24053	5.08523	0.296602	0.863788	6.08392	14.7265	0.542223	0.369236	2.42048	7.6481	4.72582	0.335897	0.306122	1.14286	5.14286	75.4286	0.524802	3.85714	0.72613	0.4375	0.345982	4.10785	0.0897387	1.36391
周张洪	64	2	4.82812	3.4684	133.2	184.7	632981	1.76391	27	189	16.7812	161.125	166	117	327895	412.943	8.75837	4.34842	1.41258	0.913194	0.619051	2.96232	0.122435	0.209865	5.92463	0.308286	0.900422	9.42478	19.017	0.326931	0.21529	2.54036	12.1004	7.6691	0.193227	0.259259	1.33333	8.44444	153.667	0.323302	4.33333	0.684568	0.375	0.253649	3.77871	0.0926549	1.06569
冯丽娟老师哥哥	65	2	2.41406	4.50963	109.1	143.6	132929	0.954434	25.5	145	12.875	128.125	130.5	107	68859.6	200.109	2.92917	0.248209	0.441667	0.441667	0.779167	1.71667	0.402708	0.495833	3.43333	0.512551	0.243724	2.55357	7.53214	1.06339	0.611607	1.55021	3.35476	1.53115	0.51255	0.555556	0.222222	2	35	0.75	1	0.43	0.375	0.55814	0.447917	0.112305	0.521739
冯丽娟老师哥哥	66	2	2.41406	4.36414	86.4	133.3	103704	1.54879	14.5	162	16.5	111.25	112.5	71	53720.5	586.438	9.50833	4.99624	3.3	1.325	0.595833	3.15417	0.283125	0.391667	6.30833	0.360544	1.36876	9.46429	15.8929	0.338532	0.259167	2.18986	4.30952	7.85714	0.239325	0.25	2.1875	9.75	63.75	0.350278	2.5	0.76	0.5	0.548124	6.75099	0.19249	3.18182
鲁家成	67	2	2.41406	4.16241	120	146	198265	1.24067	17	151	10.1653	133.727	139	110	102705	141.107	3.84583	1.03389	0.622917	0.539583	0.744097	1.95938	0.294019	0.452083	3.91875	0.418293	0.419556	3.60317	8.13492	0.872878	0.489198	1.87584	4.82341	2.59369	0.400993	0.375	0.6875	3.75	52.5	0.590278	1.5	0.567602	0.363636	0.724024	1.23305	0.046343	1.33627
鲁家成	68	2	3.21875	4.12266	119.7	138.6	168411	1.29546	9.75	153	7.9	129.3	129.5	108	87239.9	122.61	2.8881	1.23091	0.928571	0.745238	0.657937	1.7131	0.240451	0.336905	3.42619	0.446473	0.383925	3.79732	6.48036	0.899008	0.442535	1.91487	5.60714	3.28529	0.338337	0.375	0.5	4.5	24.5	0.402778	1	0.355903	0.4	0.522876	1.55353	0.0655	1.17252
汪岷	69	2	2.41406	4.83611	179	206	220795	0.918296	20	206	9.83333	191.5	189.5	177	114376	126.917	1.79167	0.226526	0.604167	0.604167	0.697917	1.36458	0.388021	0.458333	2.72917	0.537778	0.231111	2.1	4.06667	1.75417	0.725	1.38678	3.45	1.70093	0.560301	0.5	0.25	2.5	16	0.625	1	0.15625	0.333333	0.608108	0.548148	0.118519	0.625
汪岷	70	2	2.41406	4.3858	164.4	199.4	309658	1.44662	15	229	15.0864	184.222	186	142	160408	468.617	8.64167	7.85557	2.30833	1.15833	0.602083	2.95417	0.269583	0.416667	5.90833	0.383976	1.29935	9.44048	19.619	0.377235	0.251574	2.21312	4.78571	7.72917	0.230447	0.25	2.1875	9.75	88.5	0.350278	2.5	0.756944	0.444444	0.611255	5.28844	0.1343	3.48033
余贵平	71	2	2.41406	4.50439	118.8	205.6	195067	1.95021	58.5	223	33.9592	162.714	148	117	101048	1390.78	8.25	27.6272	4.875	1.83333	0.455903	2.89583	0.173611	0.229167	5.79167	0.271542	2.16454	9.66071	11.7857	0.500982	0.36817	1.93425	5.66667	9.12946	0.334967	0.28	2.16	10	20.2	0.3205	2.6	0.7	0.714286	0.380435	10.7651	0.545773	3.68132
李昌清	72	2	1.60938	5.40331	64.9	71.2	18403	-3.20343e-16	2.25	73	2.625	67.75	67	64	9533.08	10.6875	1	0	0	0	1	1	1	1	2	1	0	1	3	3	1	0.459148	1.83333	0.5	0.5	1	0	1	16	1	1	0.0625	0.25	1000000	0	0	0
邓阿妹	73	2	2.41406	4.50439	84.6	102.6	61580	0.591673	13	108	7.34694	93.4286	92	84	31899.5	68.2449	1.41667	0.068287	0.416667	0.416667	0.791667	1.20833	0.4375	0.583333	2.41667	0.68	0.16	1.6	2.9	2.15	0.85	1.48418	2.8	1.33056	0.580556	0.5	0.25	2.5	20	0.625	1	0.513889	0.285714	0.625	0.457143	0.0472303	0.740741
张国富	74	2	2.41406	4.3858	113	155.2	161120	1.89106	27	160	16.1728	132.444	134	97	83463	360.691	7.59167	9.03744	1.22083	0.8875	0.611806	2.70208	0.157188	0.216667	5.40417	0.285077	0.933275	7.95089	12.0625	0.33817	0.259766	2.16105	5.72321	6.92299	0.240165	0.25	1.25	7.5	45.5	0.355903	1.5	0.368056	0.444444	0.761636	3.09093	0.0886145	3.21981
张国富	75	2	1.60937	4.83611	100.5	159.5	108992	1.9183	43.5	163	23.6667	132.333	137	95	56459.8	653.222	9	7.14319	2.89583	1.39583	0.505208	3.05208	0.241319	0.270833	6.10417	0.270833	1.16667	8.75	13.4375	0.321181	0.288628	1.93872	5	7.57812	0.28049	0.25	1.25	7.5	26.25	0.355903	2	0.625	0.666667	0.517241	6.87407	0.236214	2.67857
周华清	76	2	1.60938	4.83611	91	110	61381	1	14.75	111	7.16667	100.833	101.5	91	31796.4	62.8056	2.45833	0.202799	0.645833	0.645833	0.677083	1.64583	0.427083	0.458333	3.1875	0.51	0.245	2.35	4.4875	0.971875	0.6625	1.43548	3.7	1.81562	0.585156	0.555556	0.222222	2	13.6667	0.75	1	0.453704	0.5	0.517241	0.644444	0.161111	0.517241
周华清	77	2	2.41406	4.67327	93.4	117	78676	1.37878	11.5	126	8.77551	105.429	105	88	40755.5	124.245	3.64583	0.481409	0.916667	0.625	0.736111	2.02083	0.395833	0.458333	3.83333	0.394444	0.476111	3.96667	7.31667	0.812037	0.462037	1.92011	3.66667	3.35139	0.388426	0.333333	0.666667	4.66667	25.6667	0.453704	1	0.4375	0.428571	1.09375	1.40381	0.0709427	1.80039
孟昊妈妈	78	2	2.41406	4.50439	93.4	118.6	77524	1.44882	8.5	136	9.83673	104.286	101	88	40158.8	199.347	3.1875	1.9209	1.0625	0.6875	0.71875	1.78125	0.265625	0.3125	3.5625	0.366939	0.542449	3.70714	5.95714	1.09206	0.529563	2.10365	3.7	3.14464	0.388938	0.333333	0.666667	4.66667	18	0.453704	1.66667	0.407407	0.428571	0.777778	1.67857	0.0932945	1.85714
孟昊妈妈	79	2	1.60938	5.18188	115	140.2	86269	0.721928	6	141	11.04	130.6	137	103	44688.9	197.44	3.58333	0.0341435	0.208333	0.208333	0.895833	1.89583	0.71875	0.791667	3.79167	0.590278	0.204861	3.125	8.625	0.8125	0.46875	1.20915	2.08333	1.75	0.382812	0.5	0.25	2.5	32.5	0.625	1	0.53125	0.4	1.66667	0.24	0.048	1.33333
邓铁兵	80	2	1.60938	5.40331	71.5	90.7	26938	0.811278	7.5	94	7.25	81.5	82.5	67	13954.4	92.25	3	0.03125	0.5	0.5	0.75	1.75	0.5625	0.625	3.5	0.572917	0.213542	3.0625	6.0625	0.671875	0.484375	1.39154	2.25	2.3125	0.4375	0.5	0.25	2.5	18.5	0.625	1	0.555556	0.5	1	0.5	0.09375	1
胡刚琼	81	2	2.41406	4.06286	84	131	138131	1.49492	33	136	17.686	110.455	114	84	71554.3	357.157	4.26071	4.72943	1.68214	1.03095	0.593056	2.07292	0.189026	0.292262	4.14583	0.374515	0.728521	4.09975	8.47475	0.954931	0.561413	1.77152	6.47222	3.04072	0.497755	0.36	0.56	3.8	33	0.522222	1.4	0.484722	0.454545	0.261623	2.84122	0.228834	0.95552
胡刚琼	82	2	1.60938	4.83611	134.5	162	131072	0.918296	17.75	167	10	147.333	145.5	134	67897.6	138.222	1.79167	0.226526	0.604167	0.604167	0.697917	1.36458	0.388021	0.458333	2.72917	0.537778	0.231111	2.1	4.06667	1.75417	0.725	1.38678	3.45	1.70093	0.560301	0.5	0.25	2.5	16	0.625	1	0.15625	0.333333	0.608108	0.548148	0.118519	0.625
杨少兵	83	2	2.41406	4.3858	92	143	120719	1.53049	42	143	19.6543	113.889	101	92	62534.6	442.543	4.10833	4.87356	1.29167	0.858333	0.643056	2.00417	0.184097	0.216667	4.00833	0.363644	0.734233	4.20238	7.96131	0.938327	0.544974	2.0358	4.91071	3.26265	0.446635	0.375	0.6875	3.75	26.75	0.590278	1.5	0.368056	0.444444	0.420982	2.18277	0.173201	1.41855
杨少兵	84	2	2.41406	4.50963	113.6	160	149682	1.5	22.25	167	16	135.5	134	108	77537.9	350	4.41667	1.11511	1.35	0.958333	0.586111	2.1375	0.203229	0.241667	4.275	0.364442	0.52877	4.36905	6.85119	0.530919	0.432209	1.82968	5.47619	3.74851	0.407531	0.36	0.56	3.8	15.6	0.522222	2.2	0.672222	0.625	0.609137	1.95556	0.122222	1.19318
周友春	85	2	2.41406	4.36414	87.2	125.6	89562	1.40564	24.75	134	14.5	104.5	101	83	46394.7	275	2.89583	1.2685	1.5875	1.09583	0.534028	1.76042	0.231319	0.295833	3.52083	0.40749	0.492896	3.27083	4.03274	0.947834	0.587715	1.56706	6.40476	3.12665	0.543981	0.36	0.56	3.8	7.8	0.522222	2.2	0.672222	0.625	0.390789	2.71911	0.131617	1.18839
郝天成	86	2	1.60938	5.40331	96.6	113.2	43926	1	13	115	7.5	104.5	103.5	96	22754.4	61.25	2.125	0.25	0.75	0.75	0.625	1.5	0.5	0.5	3	0.5	0.25	2.5	4.375	1.09375	0.625	1	3.5	2.03125	0.507812	0.5	0.25	2.5	10	0.625	2	0.25	0.5	0.75	0.666667	0.166667	0.75
黄安红	87	2	3.21875	3.80353	135.1	180.7	354354	1.72441	27	188	17.2041	157.571	161.5	102	183562	482.245	8.61111	5.0222	1.04206	0.836508	0.616005	2.92222	0.162764	0.234127	5.84444	0.313328	0.792759	8.76305	16.4823	0.309834	0.210983	2.27237	8.26422	7.46606	0.194083	0.265306	1.06122	8.42857	62	0.263889	3	0.646825	0.5	0.431607	3.47798	0.0749832	1.82557
黄安红	88	2	2.41406	4.36414	170.4	210.8	281492	1.5	21.5	222	14.9375	186.75	179.5	169	145818	310.938	4.47083	0.931744	1.29167	0.9	0.615278	2.15417	0.195243	0.245833	4.30833	0.357426	0.546627	4.3869	7.29762	0.563161	0.437665	1.94223	4.79762	3.65923	0.406291	0.375	0.6875	3.75	25.5	0.590278	1.5	0.578125	0.5	0.587413	1.99206	0.124504	1.17131
黄德英	89	2	1.60937	5.40331	107.6	126	54132	0.811278	13	129	8	116	114	107	28041.3	77	1.5	0.03125	0.5	0.5	0.75	1.25	0.5625	0.625	2.5	0.572917	0.213542	1.9375	2.6875	1.51562	0.765625	1.39154	2.25	1.75	0.578125	0.5	0.25	2.5	6.5	0.625	1	0.555556	0.5	1	0.5	0.09375	1
黄德英	90	2	3.21875	4.16241	58	101	77209	1.43537	22.5	123	14.9421	81.3636	80	51	39995.6	398.959	3.58036	2.47819	0.767857	0.642857	0.699405	1.875	0.194675	0.294643	3.75	0.387824	0.476667	4.21944	9.77986	1.00247	0.428164	2.07813	5.29306	3.43698	0.322565	0.333333	0.666667	4.66667	63	0.453704	1	0.12963	0.272727	0.551971	1.31793	0.0732532	1.24196
许承道	91	2	2.41406	4.50439	109	145.6	115738	1.84237	15.5	157	13.0612	127.429	127	97	59954.3	295.959	7.25	6.10938	1.5	0.875	0.651042	2.6875	0.25	0.3125	5.375	0.28542	0.922415	7.39048	11.5905	0.375116	0.293171	2.16689	4.56667	6.34048	0.272685	0.25	1.25	7.5	28.5	0.355903	1.5	0.590278	0.571429	1.10526	3.21905	0.0907029	3.55102
许承道	92	2	4.02344	4.0199	112.4	162.4	233007	1.73815	28	167	17.6095	132.077	135	85	120702	479.302	8.00397	4.14807	1.38046	0.976687	0.578952	2.83606	0.157544	0.243056	5.67212	0.324609	0.718246	7.71031	13.1512	0.302581	0.22957	2.07689	9.12727	6.82736	0.217209	0.306122	0.816327	6.71429	46.1429	0.290675	3	0.648571	0.538462	0.350225	4.16688	0.0913204	1.48608
蔡绥林	93	2	3.21875	4.19644	43.4	63	28346	0.918296	15	71	8.2963	55.3333	60	41	14683.7	87.7778	2.925	0.265733	0.4625	0.4625	0.76875	1.71875	0.394687	0.51875	3.4375	0.512813	0.243594	2.66875	8.72708	1.10208	0.582812	1.63001	3.5125	1.56157	0.478458	0.555556	0.222222	2	49.6667	0.75	1	0.425926	0.333333	0.509503	0.436155	0.102528	0.481651
冯宝万	94	2	3.21875	3.93838	124.6	195.4	323448	2.13394	39	207	22.2485	155.231	154	110	167552	784.024	8.89583	14.5358	1.99306	1.15972	0.552083	2.95486	0.106047	0.170139	5.90972	0.23878	1.39226	8.86553	13.6553	0.353019	0.289414	2.50437	8.70076	7.89536	0.276319	0.21875	1.73438	8.625	33	0.35309	3.75	0.695312	0.615385	0.483336	6.85631	0.101561	3.1427
冯宝万	95	2	2.41406	4.3858	113	144.2	148182	0.991076	22	149	12.6173	127.556	123	105	76760.9	194.247	2.4625	0.407785	0.5375	0.5375	0.73125	1.57708	0.28441	0.339583	3.15417	0.538141	0.230929	2.10268	5.26339	1.2567	0.72433	1.51487	4.09821	1.3125	0.591239	0.555556	0.222222	2	27	0.75	1.66667	0.375	0.333333	0.382127	0.58154	0.138677	0.395667
杜琼	96	2	1.60938	4.78621	99.4	155	108968	1.84237	37.5	158	20.9388	122.571	115	94	56447.3	543.102	7.20833	5.51984	2.66667	1.43333	0.476389	2.725	0.199722	0.2375	5.45	0.305839	1.0788	7.52381	10.0238	0.333416	0.294354	1.93221	5.66667	6.89881	0.284588	0.28	1.04	6.8	18.8	0.334722	2.6	0.7	0.714286	0.41543	6.53952	0.214286	2.30904
杜琼	97	2	2.41406	4.3858	113.6	141.8	155240	0.918296	24	149	11.7778	130.667	137	108	80417	175.111	2.98333	0.0677435	0.508333	0.508333	0.745833	1.74583	0.38875	0.491667	3.49167	0.507653	0.246173	2.66071	7.73214	0.901786	0.584821	1.53228	4.19048	1.86161	0.534877	0.625	0.1875	1.75	36.75	0.8125	2.5	0.756944	0.444444	0.410959	0.540741	0.12716	0.38835
张军	98	2	3.21875	4.10435	109.3	167.5	221779	2.05459	31.5	182	22.5833	133.25	130.5	81	114885	726.021	8.875	12.5549	2.51042	1.17708	0.582118	2.98438	0.128038	0.21875	5.96875	0.260956	1.30534	9.17626	13.5288	0.369736	0.236408	2.44127	7.11212	8.21159	0.210792	0.2	2	11	54.2	0.292722	1.4	0.480222	0.416667	0.45677	7.28256	0.104425	3.07987
